# Supplementary material
Source: Elsevier journal article supplement (https://discovery-pp.ucl.ac.uk/1474200/7/mmc1.pdf)
Supplement: mmc1 [file mmc1.pdf]

**Supplementary Table 1.** Mean grating orientation task performance (percent correct) and 95% confidence intervals in each experimental condition.

| TMS condition | Visual condition | Mean   | 95% confidence interval |             |
|---------------|------------------|--------|-------------------------|-------------|
|               |                  |        | Lower bound             | Upper bound |
| Sham          | Own-hand         | 70.03% | 65.17%                  | 74.89%      |
|               | Other-hand       | 69.07% | 64.88%                  | 73.25%      |
|               | Object           | 65.09% | 60.89%                  | 69.29%      |
| hVIP          | Own-hand         | 65.15% | 61.35%                  | 68.94%      |
|               | Other-hand       | 69.07% | 65.86%                  | 72.28%      |
|               | Object           | 64.92% | 61.22%                  | 68.63%      |
| EBA           | Own-hand         | 61.63% | 57.72%                  | 65.55%      |
|               | Other-hand       | 65.15% | 61.25%                  | 69.05%      |
|               | Object           | 66.14% | 62.16%                  | 70.13%      |
